# Supplementary material for: Biochar carrying hydrocarbon decomposers promotes degradation during the early stage of bioremediation
Source: Copernicus journal article supplement (doi:10.5194/bg-2016-292), 2016-07-25
Supplement: Supplementary file 1 [file bg-2016-292-supplement.pdf]

Table S1. Characteristics of biochar used in the study.

| Parameter                              | Content, % | Parameter | Content, % |
|----------------------------------------|------------|-----------|------------|
| C <sub>org</sub>                       | 57         | Cr        | 0.26       |
| N <sub>tot</sub>                       | 0.25       | Cu        | <0.00001   |
| Active surface area, m <sup>2</sup> /g | 49.7       | Fe        | 0.129      |
| pH                                     | 6.5        | Mn        | 0.031      |
| Al                                     | 0.053      | Ni        | 0.17       |
| Cd                                     | 0.029      | Pb        | 0.00019    |
| Co                                     | <0.00001   | Zn        | 0.0065     |

Table S2. Primers used for sample indexing.

---

| Primer | Sequence, 5'-3'                                     |
|--------|-----------------------------------------------------|
| II501F | AATGATACGGCGACCACCGAGATCTACACTAGATCGCTCGTCGGCAGCGTC |
| II701R | CAAGCAGAAGACGGCATAACGAGATTCGCCTTAGTCTCGTGGGCTCGG    |
| II502F | AATGATACGGCGACCACCGAGATCTACACCTCTCTATTCGTCGGCAGCGTC |
| II702R | CAAGCAGAAGACGGCATAACGAGATCTAGTACGGTCTCGTGGGCTCGG    |
| II503F | AATGATACGGCGACCACCGAGATCTACACTATCCTCTTCGTCGGCAGCGTC |
| II703R | CAAGCAGAAGACGGCATAACGAGATTTCTGCCTGTCTCGTGGGCTCGG    |
| II504F | AATGATACGGCGACCACCGAGATCTACACAGAGTAGATCGTCGGCAGCGTC |
| II704R | CAAGCAGAAGACGGCATAACGAGATGCTCAGGAGTCTCGTGGGCTCGG    |
| II505F | AATGATACGGCGACCACCGAGATCTACACGTAAGGAGTCGTCGGCAGCGTC |
| II705R | CAAGCAGAAGACGGCATAACGAGATAGGAGTCCGTCTCGTGGGCTCGG    |
| II506F | AATGATACGGCGACCACCGAGATCTACACACTGCATATCGTCGGCAGCGTC |
| II706R | CAAGCAGAAGACGGCATAACGAGATCATGCCTAGTCTCGTGGGCTCGG    |
| II507F | AATGATACGGCGACCACCGAGATCTACACAAGGAGTATCGTCGGCAGCGTC |
| II707R | CAAGCAGAAGACGGCATAACGAGATGTAGAGAGGTCTCGTGGGCTCGG    |
| II508F | AATGATACGGCGACCACCGAGATCTACACCTAAGCCTTCGTCGGCAGCGTC |
| II708R | CAAGCAGAAGACGGCATAACGAGATCCTCTCTGGTCTCGTGGGCTCGG    |
| II709R | CAAGCAGAAGACGGCATAACGAGATAGCGTAGCGTCTCGTGGGCTCGG    |
| II710R | CAAGCAGAAGACGGCATAACGAGATCAGCCTCGGTCTCGTGGGCTCGG    |
| II711R | CAAGCAGAAGACGGCATAACGAGATTGCCTCTTGTCTCGTGGGCTCGG    |
| II712R | CAAGCAGAAGACGGCATAACGAGATTCCTCTACGTCTCGTGGGCTCGG    |

---
